# Supplementary material
Source: Research Square preprint supplement (doi:10.21203/rs.3.rs-9485533/v1)
Supplement: Supplementary file 1 [file c4f7ef73ce3d17c331a622b8.docx]

**Supplementary Figure S1**

**B**

**A**

**C**

**Figure S1.** Effect ofPH Formulations**(MP2025 and AM2025) and application rates (0, 0.05%, and 0.1%)** on **(A) plant height (PH, cm), (B) stem diameter (SD, mm) and (C)** leaf expansion **(LE, cm) in** S. lycopersicum. Values represent mean ± standard error (n = 8). Different small letters indicate significant differences according to Duncan’s multiple range test (p ≤ 0.05).
